# Supplementary material
Source: publisher figshare collection journal article supplement (https://acs.figshare.com/ndownloader/files/4209931)
Supplement: Supplementary file 1 [file 4209931]

## Supporting information

**Table S.1 Crop rotation in the six fields over five years (2003-2007)**

|                | <b>2003</b>   | <b>2004</b>   | <b>2005</b> | <b>2006</b>  | <b>2007</b>   |
|----------------|---------------|---------------|-------------|--------------|---------------|
| <b>Field 1</b> | Sugar beet    | Winter Wheat  | Set-aside   | Winter wheat | oilseed rape  |
| <b>Field 2</b> | Spring Barley | Spring Barley | Potatoes    | Winter wheat | Sugar beet    |
| <b>Field 3</b> | Spring Barley | Spring Barley | Sugar beet  | Winter wheat | Oilseed rape  |
| <b>Field 4</b> | Potatoes      | Winter Wheat  | Set-aside   | Winter wheat | oilseed rape  |
| <b>Field 5</b> | Sugar beet    | Winter Barley | Potatoes    | Winter wheat | Potatoes      |
| <b>Field 6</b> | Potatoes      | Winter Wheat  | Sugar beet  | Winter wheat | Spring Barley |

**Table S.2 Summary for the field operations during crop rotation (2003-2007)**

| <b>Crop</b>          | <b>Planting date</b> | <b>Harvesting date</b> | <b>Tillage date</b>  | <b>Tillage methods</b>                   |
|----------------------|----------------------|------------------------|----------------------|------------------------------------------|
| <b>Sugar beet</b>    | 28th April           | 17th Nov               | 15th March           | Plough ( 20cm )                          |
| <b>Spring barley</b> | 1st Mar              | 17th Aug               | 15th Feb<br>20th Feb | Plough ( 20cm)<br>Power Harrowing (20cm) |
| <b>Winter barley</b> | 15th Dec             | 17th Aug               | 20th Nov<br>10th Dec | Plough (20cm)<br>Power Harrowing(20cm)   |
| <b>Potato</b>        | 5th April            | 3rd Oct                | 20-Mar               | Plough (30cm)                            |
| <b>Oilseed rape</b>  | 30th Aug             | 17th Aug               | 20th Aug<br>25th Aug | Plough ( 20cm)<br>Power harrowing (20cm) |
| <b>Winter wheat</b>  | 30th Sep             | 17th Aug               | 15th Sep             | Plough ( 20cm )                          |

Table S.3 Fertilizer overall application rate<sup>1</sup> at Heygates Farm during crop rotation

| Crop year 2003                       |               |               |               |          |
|--------------------------------------|---------------|---------------|---------------|----------|
|                                      | Sugar beet    | Spring barley | Potato        |          |
| Area %                               | 26.98%        | 44.36%        | 28.66%        |          |
| N (t/ha)                             | 1.27E-01      | 1.38E-01      | 1.71E-01      |          |
| P <sub>2</sub> O <sub>5</sub> (t/ha) | 3.63E-02      | 2.34E-02      | 1.29E-01      |          |
| K <sub>2</sub> O (t/ha)              | 1.68E-01      | 4.68E-02      | 2.69E-01      |          |
| MgO (t/ha)                           | 8.01E-02      | 5.77E-03      | 1.29E-02      |          |
| SO <sub>3</sub> (t/ha)               | 1.04E-02      | 7.41E-02      | 0.0           |          |
| Na <sub>2</sub> O (t/ha)             | 2.60E-01      | 0.0           | 0.0           |          |
| Limestone (t/ha)                     | 5.13E-03      | 4.06E-03      | 0.0           |          |
| Crop year 2004                       |               |               |               |          |
|                                      | Winter Wheat  | Spring barley | Winter barley |          |
| Area %                               | 35.73%        | 44.36%        | 19.91%        |          |
| N (t/ha)                             | 2.15E-01      | 1.18E-01      | 2.15E-01      |          |
| P <sub>2</sub> O <sub>5</sub> (t/ha) | 7.30E-03      | 2.34E-02      | 0.0           |          |
| K <sub>2</sub> O (t/ha)              | 1.46E-02      | 4.67E-02      | 0.0           |          |
| MgO (t/ha)                           | 1.80E-03      | 5.76E-03      | 0.0           |          |
| SO <sub>3</sub> (t/ha)               | 4.81E-02      | 5.61E-02      | 4.46E-02      |          |
| Na <sub>2</sub> O (t/ha)             | 0.0           | 0.0           | 0.0           |          |
| Limestone (t/ha)                     | 1.27E-03      | 4.05E-03      | 0.0           |          |
| Crop year 2005                       |               |               |               |          |
|                                      | Set-aside     | Potato        | Sugar beet    |          |
| Area %                               | 23.25%        | 49.30%        | 27.45%        |          |
| N (t/ha)                             | 0.0           | 2.07E-01      | 7.87E-02      |          |
| P <sub>2</sub> O <sub>5</sub> (t/ha) | 0.0           | 1.97E-01      | 4.93E-02      |          |
| K <sub>2</sub> O (t/ha)              | 0.0           | 2.97E-01      | 6.95E-02      |          |
| MgO (t/ha)                           | 0.0           | 6.73E-02      | 6.36E-02      |          |
| SO <sub>3</sub> (t/ha)               | 0.0           | 0.0           | 0.0           |          |
| Na <sub>2</sub> O (t/ha)             | 0.0           | 0.0           | 2.00E-01      |          |
| Limestone (t/ha)                     | 0.0           | 0.0           | 0.0           |          |
| Crop year 2006 Winter wheat          |               |               |               |          |
| Area %                               | 100%          |               |               |          |
| N (t/ha)                             | 208.55        |               |               |          |
| P <sub>2</sub> O <sub>5</sub> (t/ha) | 4.84          |               |               |          |
| K <sub>2</sub> O (t/ha)              | 8.80          |               |               |          |
| MgO (t/ha)                           | 2.20          |               |               |          |
| SO <sub>3</sub> (t/ha)               | 27.02         |               |               |          |
| Limestone (t/ha)                     | 9.83          |               |               |          |
| Crop year 2007                       |               |               |               |          |
|                                      | Spring barley | Oilseed rape  | Sugar beet    | Potato   |
| Area %                               | 13.60%        | 35.10%        | 31.87%        | 19.44%   |
| N (t/ha)                             | 9.86E-02      | 2.24E-01      | 1.03E-01      | 2.74E-01 |
| P <sub>2</sub> O <sub>5</sub> (t/ha) | 2.08E-02      | 3.68E-02      | 4.77E-02      | 8.98E-02 |
| K <sub>2</sub> O (t/ha)              | 3.78E-02      | 3.68E-02      | 9.46E-02      | 2.70E-01 |
| MgO (t/ha)                           | 8.56E-03      | 0.0           | 5.77E-02      | 3.48E-02 |
| SO <sub>3</sub> (t/ha)               | 7.13E-02      | 8.93E-02      | 0.0           | 0.0      |
| Na <sub>2</sub> O (t/ha)             | 0.0           | 0.0           | 1.40E-01      | 0.0      |
| Limestone (t/ha)                     | 2.95E-03      | 4.40E-02      | 0.0           | 0.0      |

*Note:* 1. Overall application rate is “calculated as the total quantity of nutrient divided by the total extent of area (including any areas without application of the fertilizer)” [1]

**Table S.4 C-content for wheat grain**

|                                             | Wheat flour     | Wheat feed | Wheat grain |
|---------------------------------------------|-----------------|------------|-------------|
| <b>Proportion (% of harvested grain)</b>    | 77.00%          | 23.00%     | 100.00%     |
| <b>Moisture content (%)</b>                 | 14.00%          | 12.77%     | 14.50%      |
| <b>Starch (% of dry basis )</b>             | 88.95%          | 63.47%     | 83.09%      |
| <b>Protein(% of dry basis )<sup>2</sup></b> | 11.05%          | 17.16%     | 12.45%      |
| <b>Oil (% of dry basis )</b>                | NI <sup>1</sup> | 7.76%      | 1.78%       |
| <b>Fiber (% of dry basis )</b>              | NI <sup>1</sup> | 7.72%      | 1.78%       |
| <b>Ash (% of dry basis )</b>                | NI <sup>1</sup> | 3.90%      | 0.90%       |
| <b>C content (% of dry basis )</b>          | 45.56%          | 47.09%     | 45.91%      |

**Notes:**

1. NI=No information.

2. In Heygates lab tests, total N was analyzed, then protein content was estimated from equation %Protein =% Nitrogen × NF. Where NF =Nitrogen Factor;  $NF_{\text{FLOUR}}=5.75$ ;  $NF_{\text{FEED}}=6.25$ .

The theoretical C sequestration was calculated according to the lab-derived composition of the wheat flour and wheat feed produced from flour milling at Heygates Ltd. The C contained in wheat protein was estimated as 54.55% based on the formula  $C_{16}H_{24}O_5N_4$  [2]. Composition of oil was derived from the Phyllis database (76% C content dry basis) [3]. C content in fiber was estimated on the basis of typical composition of wheat fiber presented by Knudsen [4] where the C component in each anhydrous sugar monomer was calculated from its formula and lignin was assumed to contain 60% C [3]. Overall CO<sub>2</sub> ‘sequestered’ into the wheat grain was estimated as 1.47kg CO<sub>2</sub>/kg fresh grain (moisture content 14.5%).

**Table S.5 Data source**

| <b>Unit processes</b>                                     | <b>Data sources</b>                                                                                            |
|-----------------------------------------------------------|----------------------------------------------------------------------------------------------------------------|
| <b>WBF production</b>                                     |                                                                                                                |
| Wheat farming                                             | Heygates Ltd                                                                                                   |
| Wheat flour milling                                       | Heygates Ltd                                                                                                   |
| WBF production                                            | Greenlight Product Ltd                                                                                         |
| PVOH production                                           | [5-7]                                                                                                          |
| Transportation                                            | Greenlight Product Ltd and feedstock suppliers                                                                 |
| <b>WBF case study</b>                                     |                                                                                                                |
| Extruded HDPE and LDPE resin and expandable PS production | EU average data [8]                                                                                            |
| Transformation of LDPE and expandable PS into foam        | EU average EPS transformation data [9]                                                                         |
| Cardboard production                                      | Box Factory<br>EU average data [10]                                                                            |
| Coolbox case study                                        | Brunel University, Hydropac Ltd, Foam Engineers Ltd                                                            |
| Display board case study                                  | Caledonian Industries Ltd and assumptions                                                                      |
| Construction case studies                                 | Cordek Ltd, Brunel University and assumptions                                                                  |
| <b>End-of-life</b>                                        |                                                                                                                |
| PE/EPS 100% close-loop recycling                          | Ecoinvent database v 2.0, Nextek Ltd                                                                           |
| PE/EPS 100% landfill                                      | Ecoinvent database v 2.0                                                                                       |
| PE/EPS 100% incineration                                  | Ecoinvent database (v 2.0) with electricity and thermal energy export                                          |
| WBF home and industrial composting                        | Lab-determined WBF composition and meta-analysis derived composting model [11]                                 |
| WBF landfill                                              | Lab-determined WBF composition and meta-analysis derived landfill model [11]                                   |
| WBF anaerobic digestion (AD)                              | A commercial AD plant in the UK, laboratory research on WBF biodegradability and energy recovery under AD [12] |

**Table S.6 Sensitive factors affecting DNDC-simulated emissions**

| <b>Trace gas emission/leaching</b> | <b>Highly sensitive factors</b> | <b>References</b> |
|------------------------------------|---------------------------------|-------------------|
| <b>N<sub>2</sub>O</b>              | Soil clay content /texture      | [13-15]           |
|                                    | Soil organic C                  |                   |
|                                    | Annual temperature              |                   |
|                                    | Soil pH                         |                   |
|                                    | Annual precipitation            |                   |
|                                    | Soil temperature                |                   |
|                                    | Soil nitrate                    |                   |
|                                    | Fertilizer type                 |                   |
|                                    | Water management                |                   |
| <b>N<sub>2</sub></b>               | Annual precipitation            | [13]              |
|                                    | Soil pH                         |                   |
|                                    | Annual temperature              |                   |
|                                    | Soil organic C                  |                   |
| <b>CO<sub>2</sub></b>              | Soil organic C                  | [13, 16]          |
|                                    | Soil clay content /texture      |                   |
|                                    | Annual temperature              |                   |
|                                    | Crop rotation crop residue      |                   |
|                                    | Annual precipitation            |                   |
| <b>CH<sub>4</sub></b>              | Soil texture/clay content       | [16, 17]          |
|                                    | Soil pH                         |                   |
|                                    | N fertilizer application rate   |                   |
|                                    | Crop rotation                   |                   |
| <b>NO<sub>3</sub><sup>-</sup></b>  | Initial organic carbon          | [13, 18]          |

**Table S.7 IPCC vs. DNDC**

|                                                                                                   | <b>IPCC Tier 1</b>                                                    | <b>DNDC</b>                                                                                                                |
|---------------------------------------------------------------------------------------------------|-----------------------------------------------------------------------|----------------------------------------------------------------------------------------------------------------------------|
| <b>Approach classification</b>                                                                    | Empirical model                                                       | Process-based model                                                                                                        |
| <b>Application</b>                                                                                | National GHGs inventory                                               | Site specific & national GHGs inventory                                                                                    |
| <b>N<sub>2</sub>O emission pathway</b>                                                            | Direct emissions<br>Indirect emissions (air decomposition & leaching) | Direct field emissions                                                                                                     |
| <b>Factors considered</b>                                                                         | 1) Fertilizer input<br>2) Crop residue                                | 1) Fertilizer type and input<br>2) Crop rotation<br>3) Daily climate<br>4) Soil property and texture<br>5) Farm management |
| <b>Uncertainty</b>                                                                                | Large degree of uncertainty                                           | Uncertainties caused by variability of input data                                                                          |
| <b>Simulated results<br/>(average of 6 fields)<br/>kg N<sub>2</sub>O/kg fresh wheat<br/>grain</b> | Direct N <sub>2</sub> O 5.86 E-04<br>Total emissions 7.55 E-04        | Direct N <sub>2</sub> O 1.43E-04                                                                                           |

**Table S.8 Characterized ‘cradle-factory-gate’ GWP100 profiles for wheat flour and WBF products (kg CO<sub>2</sub> eq per unit product)**

|                                     |                    | <b>Average</b> | <b>Filed 1</b> | <b>Filed 2</b> | <b>Filed 3</b> | <b>Filed 4</b> | <b>Filed 5</b> | <b>Filed 6</b> |
|-------------------------------------|--------------------|----------------|----------------|----------------|----------------|----------------|----------------|----------------|
| <b>1kg Wheat flour</b>              | <b>DNDC</b>        | -0.75          | -0.89          | -0.50          | -0.96          | -0.89          | -0.54          | -0.70          |
|                                     | <b>IPCC-direct</b> | -0.61          | -0.76          | -0.37          | -0.83          | -0.77          | -0.40          | -0.58          |
|                                     | <b>IPCC-total</b>  | -0.56          | -0.72          | -0.32          | -0.78          | -0.73          | -0.35          | -0.52          |
| <b>WBF coolbox</b>                  | <b>DNDC</b>        | 0.24           | 0.20           | 0.31           | 0.18           | 0.20           | 0.30           | 0.25           |
|                                     | <b>IPCC-direct</b> | 0.28           | 0.24           | 0.35           | 0.22           | 0.24           | 0.34           | 0.29           |
|                                     | <b>IPCC-total</b>  | 0.29           | 0.25           | 0.37           | 0.23           | 0.25           | 0.36           | 0.31           |
| <b>WBF refractory lining former</b> | <b>DNDC</b>        | 83.81          | 56.43          | 130.34         | 43.40          | 56.81          | 123.15         | 91.99          |
|                                     | <b>IPCC-direct</b> | 108.61         | 80.59          | 155.22         | 67.44          | 79.47          | 148.75         | 116.09         |
|                                     | <b>IPCC-total</b>  | 118.06         | 89.30          | 165.00         | 77.05          | 87.68          | 158.80         | 125.93         |
| <b>WBF display board</b>            | <b>DNDC</b>        | 0.59           | 0.50           | 0.76           | 0.45           | 0.50           | 0.73           | 0.62           |
|                                     | <b>IPCC-direct</b> | 0.68           | 0.58           | 0.85           | 0.54           | 0.58           | 0.82           | 0.71           |
|                                     | <b>IPCC-total</b>  | 0.72           | 0.61           | 0.88           | 0.57           | 0.61           | 0.86           | 0.74           |



**Table S.9 Sensitivity analysis on N<sub>2</sub>O modeling approaches.**

| Whole life cycle with diverse end-of-life |                    |              |           |                                     |              |           |
|-------------------------------------------|--------------------|--------------|-----------|-------------------------------------|--------------|-----------|
|                                           | Display board HDPE |              |           | Refractory lining former virgin EPS |              |           |
|                                           | Landfill           | Incineration | Recycling | Landfill                            | Incineration | Recycling |
| <b>WBF AD scenario</b>                    |                    |              |           |                                     |              |           |
| <b>WBF-Average</b>                        |                    |              |           |                                     |              |           |
| <b>WBF-Field 1</b>                        |                    |              |           |                                     |              |           |
| <b>WBF-Field 2</b>                        |                    |              |           |                                     |              |           |
| <b>WBF-Field 3</b>                        |                    |              |           |                                     |              |           |
| <b>WBF-Field 4</b>                        |                    |              |           |                                     |              |           |
| <b>WBF-Field 5</b>                        |                    |              |           |                                     |              |           |
| <b>WBF-Field 6</b>                        |                    |              |           |                                     |              |           |
| <b>WBF landfill scenario</b>              |                    |              |           |                                     |              |           |
| <b>WBF-Average</b>                        |                    |              |           |                                     |              |           |
| <b>WBF-Field 1</b>                        |                    |              |           |                                     |              |           |
| <b>WBF-Field 2</b>                        |                    |              |           |                                     |              |           |
| <b>WBF-Field 3</b>                        |                    |              |           |                                     |              |           |
| <b>WBF-Field 4</b>                        |                    |              |           |                                     |              |           |
| <b>WBF-Field 5</b>                        |                    |              |           |                                     |              |           |
| <b>WBF-Field 6</b>                        |                    |              |           |                                     |              |           |

**Notes:**

=WBFs with IPCC & DNDC model deliver lower GWP<sub>100</sub> impact than petrochemical polymer

= WBFs with IPCC & DNDC model deliver higher GWP<sub>100</sub> impact than petrochemical polymer

= WBFs with DNDC model deliver lower GWP<sub>100</sub> impact than petrochemical but with IPCC Tier 1 approach deliver higher GWP<sub>100</sub> impact scores

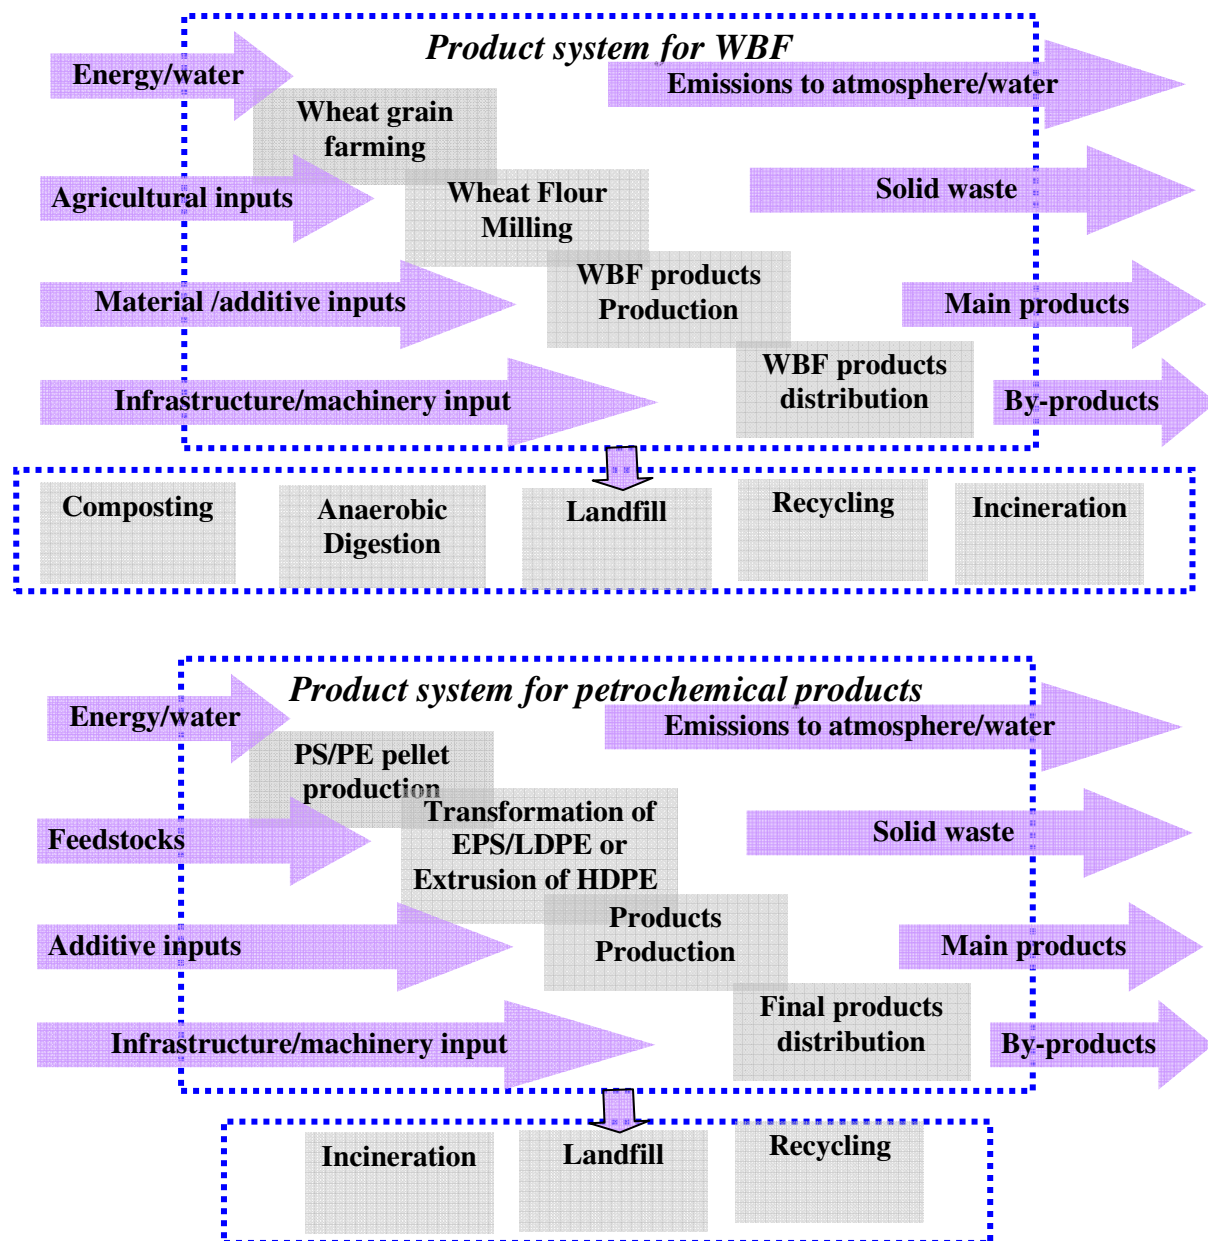

Figure S.1 Product system and system boundary for WBF and petrochemical products

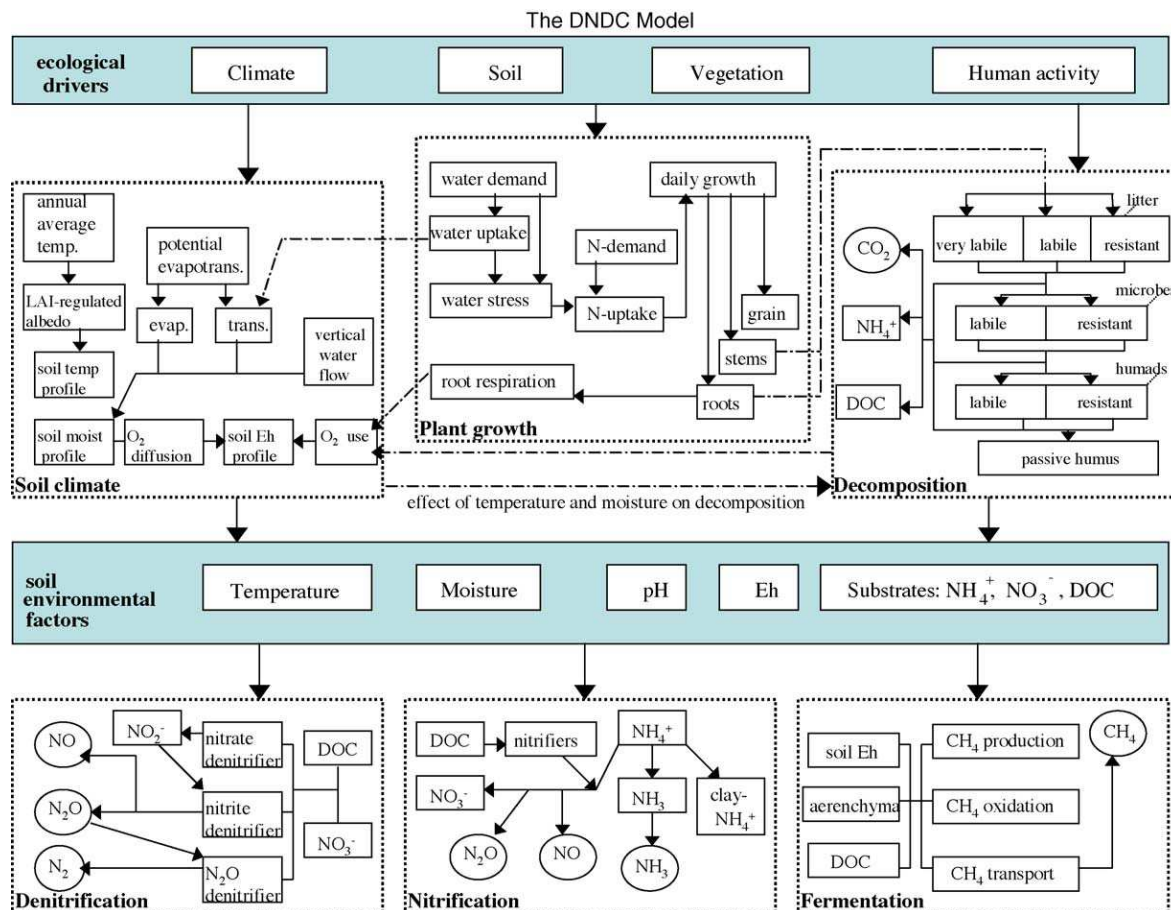

**Figure S.2 Structure of DNDC model [18]**

The DNDC model comprises two interacting components - the first comprises 3 sub-models (soil climate, plant growth and decomposition) and predicts soil environmental variables based on ecological drivers; the second component consists of nitrification, denitrification and fermentation sub-models simulating microbial activity and trace gas fluxes and N leaching.

The six sub-models play different parts and interact with each other. The soil climate sub-model integrates climate, soil properties and O<sub>2</sub> profile to simulate soil temperature and moisture [13, 19]. The climate, soil, crop parameters and field operations are integrated in the plant-growth sub-model to estimate crop growth, and its effects on soil temperature, moisture, available N and DOC etc. [20]. The decomposition sub-model mainly models 4 pools of soil organic carbon - microbial biomass, plant residues, active humus and passive humus; in addition, N dynamics during decomposition of organic matter in soil are simulated also (*e.g.* nitrogen mineralized enters the inorganic nitrogen pool as NH<sub>4</sub><sup>+</sup> which is either nitrified to NO<sub>3</sub><sup>-</sup> or is removed via crop-uptake, leaching or volatilization) [19, 21]. The denitrification

sub-model is activated by increase in soil moisture or decrease in oxygen level from events like rainfall, flooding, and freezing temperatures (below  $-5^{\circ}\text{C}$ ) [21]; when these events occur, the production, consumption and diffusion of NO and  $\text{N}_2\text{O}$  are simulated. Another main source of NO and  $\text{N}_2\text{O}$ , nitrification, is included as a sub-model and the nitrification-induced NO and  $\text{N}_2\text{O}$  is calculated as a function of predicted nitrification rate and temperature and is influenced by the soil environmental variables. In addition, the  $\text{NH}_4^+/\text{NH}_3$  equilibrium and functions for  $\text{NH}_3$  production and volatilization are also included in the nitrification model [19]. The release of  $\text{CH}_4$  is modelled in a fermentation sub-model, where  $\text{CH}_4$  production, oxidation, and transport under submerged conditions is calculated based on fermentation equations [19].

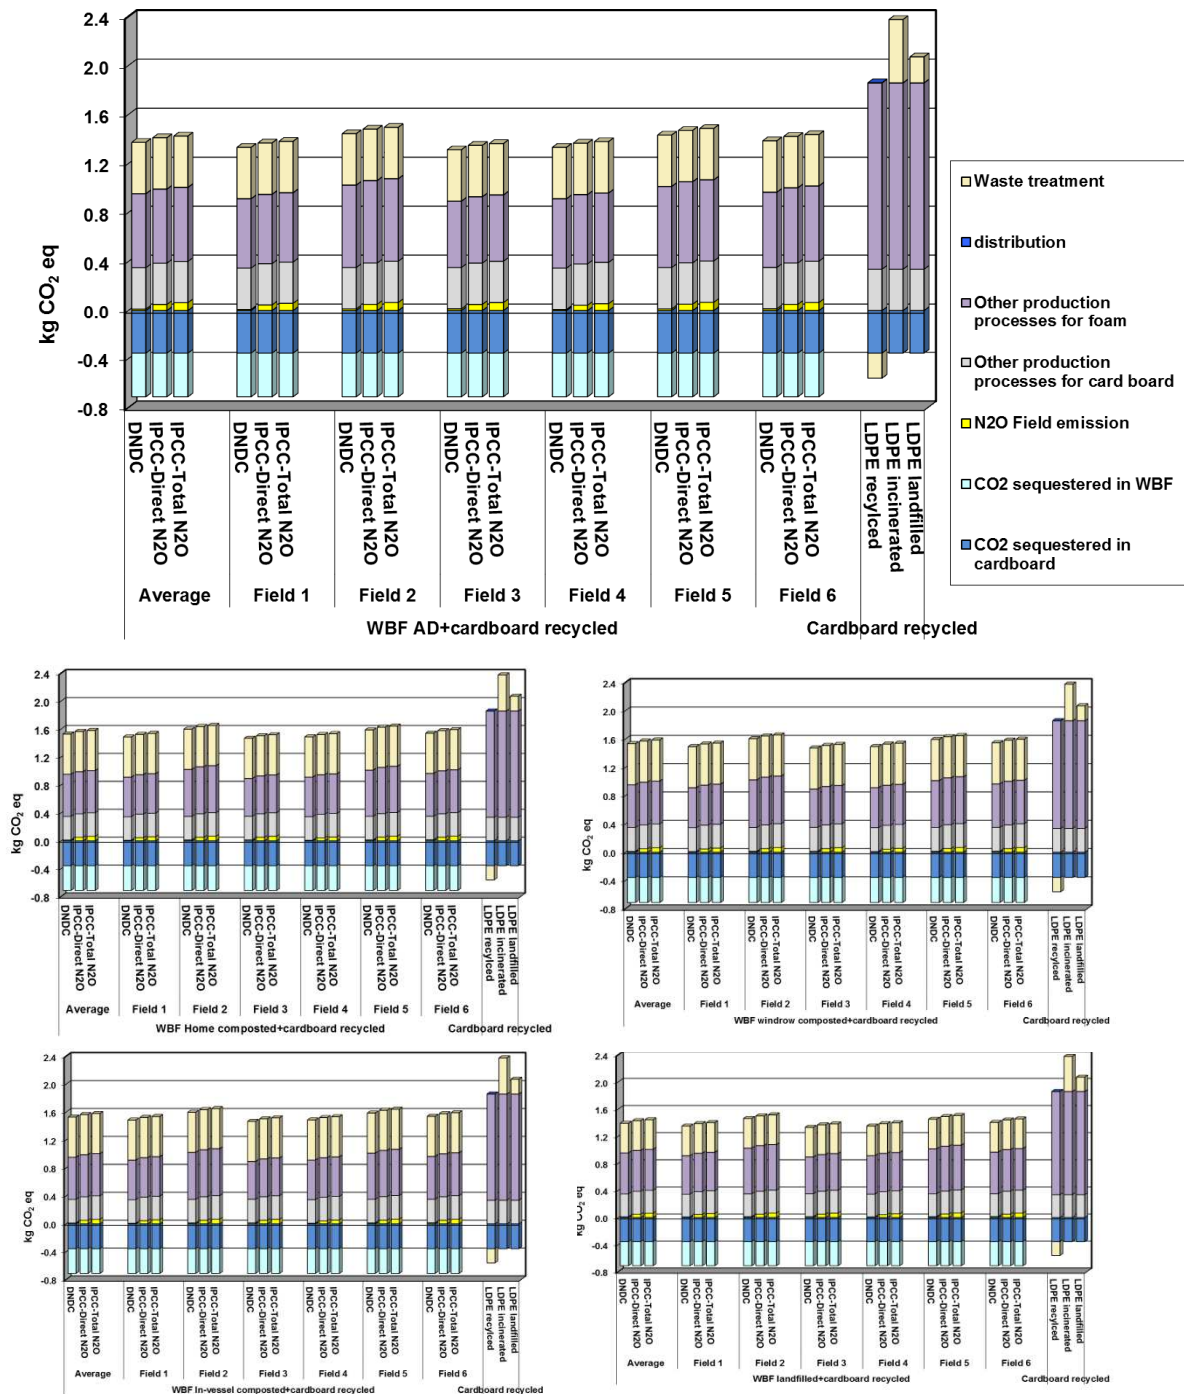

Figure S.3 Comparison of DNDC and IPCC modeling approach - characterized GWP<sub>100</sub> profiles for life cycle of coolbox (unit: per coolbox)

## References

1. *The British survey of fertiliser practice-fertiliser use on farm crops for crop year 2006*; Department for Environment Food and Rural Affairs: London, UK, 2007.
2. Rittmann, B. E.; McCarty, P. L., *Environmental biotechnology: Principles and applications*. McGraw-Hill Int. Editions, London.: 2001.
3. *Phyllis, database for biomass and waste* Website; <http://www.ecn.nl/phyllis/>.
4. Knudsen, K. E. B., Carbohydrate and lignin contents of plant materials used in animal feeding. *Animal Feed Science and Technology* **1997**, 67, (4), 319-338.
5. Finch, C. A., *Polyvinyl alcohol : properties and applications* John Wiley & Sons Ltd.: London, England, 1973.
6. Finch, C. A., *Polyvinyl Alcohol-developments*. John Wiley&Sons Ltd: Chichester, England, 1992.
7. Shah, N., Polyvinyl Alcohol production process; London, 2009 (pers. comm.)
8. Eco-profiles of the European Plastics Industry;  
<http://lca.plasticseurope.org/main2.htm>.
9. *Life cycle assessment of industrial use of expanded polystyrene packaging in Europe - case study: packaging systems for TV sets*; European Manufacturers of Expanded Polystyrene: Brussels, 2001.
10. *European database for corrugated board life cycle studies*; European Federation of Corrugated Board Manufacturer: Brussels; European Association of Makers of Corrugated Base Papers: Paris; European Containerboard Organisation: Brussels, 2006.
11. Guo, M. Life Cycle Assessment (LCA) of Light-weight Eco-composites. Ph.D. Dissertation, Imperial College London, London, UK, 2010.
12. Guo, M.; Trzcinski, A. P.; Stuckey, D. C.; Murphy, R. J., Anaerobic digestion of starch–polyvinyl alcohol biopolymer packaging: Biodegradability and environmental impact assessment. *Bioresource Technology* **2011**, 102, (24), 11137-11146.
13. Li, C. S.; Frolking, S.; Frolking, T. A., A Model of Nitrous-Oxide Evolution from Soil Driven by Rainfall Events .1. Model Structure and Sensitivity. *Journal of Geophysical Research-Atmospheres* **1992**, 97, (D9), 9759-9776.
14. Beheydt, D.; Boeckx, P.; Sleutel, S.; Li, C. S.; Van Cleemput, O., Validation of DNDC for 22 long-term N<sub>2</sub>O field emission measurements. *Atmospheric Environment* **2007**, 41, (29), 6196-6211.

15. Abdalla, M.; Wattenbach, M.; Smith, P.; Ambus, P.; Jones, M.; Williams, M., Application of the DNDC model to predict emissions of N<sub>2</sub>O from Irish agriculture. *Geoderma* **2009**, *151*, (3-4), 327-337.
16. Li, C. S.; Mosier, A.; Wassmann, R.; Cai, Z.; Zheng, X.; Huang, Y.; Tsuruta, H.; Boonjawat, J.; Lantin, R., Modeling greenhouse gas emissions from rice-based production systems: sensitivity and upscaling. *Global Biogeochemical Cycles* **2004**, *18*, (1), GB1043.
17. Babu, Y. J.; Li, C.; Frolking, S.; Nayak, D. R.; Adhya, T. K., Field validation of DNDC model for methane and nitrous oxide emissions from rice-based production systems of india. *Nutrient Cycling in Agroecosystems* **2006**, *74*, (2), 157-174.
18. Li, C. S.; Farahbakhshazad, N.; Jaynes, D. B.; Dinnes, D. L.; Salas, W.; McLaughlin, D., Modeling nitrate leaching with a biogeochemical model modified based on observations in a row-crop field in Iowa. *Ecological Modelling* **2006**, *196*, (1-2), 116-130.
19. Li, C. S., Modeling trace gas emissions from agricultural ecosystems. *Nutrient Cycling in Agroecosystems* **2000**, *58*, (1-3), 259-276.
20. Li, C. S.; Frolking, S.; Harriss, R., Modeling Carbon Biogeochemistry in Agricultural Soils. *Global Biogeochemical Cycles* **1994**, *8*, (3), 237-254.
21. Li, C.; Zhuang, Y.; Cao, M.; Crill, P.; Dai, Z.; Frolking, S.; Moore, B.; Salas, W.; Song, W.; Wang, X., Comparing a process-based agro-ecosystem model to the IPCC methodology for developing a national inventory of N<sub>2</sub>O emissions from arable lands in China. *Nutrient Cycling in Agroecosystems* **2001**, *60*, (1), 159-175.
